# Supplementary material for: Ciruvis: a web-based tool for rule networks and interaction detection using rule-based classifiers
Source: PubMed Central journal article supplement (PMC4030460; doi:10.1186/1471-2105-15-139), 2014-05-12
Supplement: 1471-2105-15-139-S7.pdf [file 1471-2105-15-139-S7.pdf]

## Table S2

Calculation of relative risks (RR) and their confidence intervals (CI) for each of the ten strongest connections for each outcome, as well as the expected (exp) values. Connections that had a RR significantly greater than what would be expected assuming independent effects are marked with yellow background and may indicate interaction effects. An asterisk '\*' in the intervals denotes  $+\infty$ .

| Rule (LHS)                                           | Score | RR   | CI RR      | RR exp | CI RR exp | Acc exp | Supp exp | Acc  | Supp |
|------------------------------------------------------|-------|------|------------|--------|-----------|---------|----------|------|------|
| <b>medianHouseValue=low</b>                          |       |      |            |        |           |         |          |      |      |
| latitude=[37.71, *),longitude=[-121.79, -118.49)     | 2181  | 1.94 | 1.89-1.99  | 2.48   | 2.39-2.58 | 0.80    | 1448     | 0.84 | 2021 |
| population=(*, 787),totalRooms=(*, 1447)             | 1229  | 1.15 | 1.11-1.19  | 1.38   | 1.33-1.45 | 0.60    | 1295     | 0.53 | 3711 |
| population=[1166, 1725),totalRooms=[1447, 2126)      | 996   | 1.46 | 1.40-1.52  | 1.12   | 1.07-1.17 | 0.52    | 1291     | 0.68 | 1105 |
| population=[1725, *),totalRooms=[2126, 3147)         | 985   | 1.34 | 1.27-1.41  | 0.89   | 0.85-0.94 | 0.44    | 1289     | 0.63 | 961  |
| latitude=[33.93, 34.25),longitude=[-118.00, *)       | 965   | 1.55 | 1.50-1.61  | 0.98   | 0.94-1.03 | 0.47    | 1263     | 0.71 | 1351 |
| longitude=[-121.79, -118.49),population=(*, 787)     | 943   | 1.61 | 1.55-1.66  | 1.76   | 1.68-1.83 | 0.70    | 1297     | 0.73 | 1463 |
| longitude=[-121.79, -118.49),totalRooms=(*, 1447)    | 926   | 1.73 | 1.68-1.79  | 2.33   | 2.24-2.43 | 0.78    | 1419     | 0.79 | 1301 |
| latitude=[34.25, 37.71),longitude=[-121.79, -118.49) | 913   | 1.57 | 1.52-1.62  | 1.67   | 1.60-1.74 | 0.68    | 1278     | 0.70 | 2649 |
| longitude=[-121.79, -118.49),population=[787, 1166)  | 911   | 1.57 | 1.51-1.63  | 1.63   | 1.56-1.70 | 0.68    | 1268     | 0.72 | 1246 |
| longitude=[-118.00, *),totalRooms=[2126, 3147)       | 869   | 1.05 | 0.99-1.11  | 1.01   | 0.96-1.06 | 0.48    | 1276     | 0.50 | 1302 |
| <b>medianHouseValue=high</b>                         |       |      |            |        |           |         |          |      |      |
| population=[1725, *),totalRooms=[3147, *)            | 2307  | 1.23 | 1.19-1.27  | 1.35   | 1.29-1.41 | 0.59    | 1299     | 0.56 | 3734 |
| population=[787, 1166),totalRooms=[1447, 2126)       | 1206  | 1.06 | 1.01-1.10  | 0.96   | 0.91-1.00 | 0.46    | 1288     | 0.50 | 2417 |
| housingMedianAge=(*, 18),totalRooms=[3147, *)        | 1090  | 1.10 | 1.06-1.15  | 1.18   | 1.13-1.23 | 0.54    | 1318     | 0.52 | 2360 |
| population=(*, 787),totalRooms=(*, 1447)             | 1062  | 0.86 | 0.83-0.90  | 0.67   | 0.63-0.70 | 0.34    | 1308     | 0.42 | 3711 |
| longitude=(*, -121.795),totalRooms=[3147, *)         | 1025  | 1.56 | 1.50-1.62  | 1.81   | 1.73-1.88 | 0.69    | 1356     | 0.72 | 1310 |
| population=[1166, 1725),totalRooms=[2126, 3147)      | 977   | 1.12 | 1.07-1.16  | 1.11   | 1.06-1.16 | 0.51    | 1290     | 0.53 | 2380 |
| longitude=(*, -121.795),population=(*, 787)          | 902   | 1.13 | 1.07-1.18  | 1.29   | 1.23-1.35 | 0.58    | 1270     | 0.53 | 1506 |
| population=[787, 1166),totalRooms=[2126, 3147)       | 890   | 1.28 | 1.22-1.33  | 1.15   | 1.10-1.20 | 0.53    | 1293     | 0.59 | 1673 |
| latitude=(*, -33.93),population=[787, 1166)          | 835   | 1.30 | 1.24-1.36  | 1.29   | 1.23-1.34 | 0.57    | 1303     | 0.61 | 1272 |
| latitude=(*, -33.93),totalRooms=[1447, 2126)         | 775   | 1.15 | 1.09-1.21  | 1.15   | 1.10-1.20 | 0.53    | 1286     | 0.54 | 1268 |
| <b>medianHouseValue=very high</b>                    |       |      |            |        |           |         |          |      |      |
| population=[1166, 1725),totalRooms=[3147, *)         | 54    | 3.12 | 2.67-3.64  | 1.13   | 0.93-1.38 | 0.05    | 1287     | 0.13 | 1275 |
| longitude=[-118.49, -118.00),totalRooms=[3147, *)    | 43    | 3.08 | 2.58-3.68  | 2.56   | 2.14-3.07 | 0.09    | 1304     | 0.14 | 883  |
| latitude=[33.93, 34.25),totalRooms=[3147, *)         | 40    | 2.51 | 2.11-2.99  | 2.52   | 2.11-3.02 | 0.09    | 1290     | 0.11 | 1169 |
| latitude=[33.93, 34.25),longitude=[-118.49, -118.00) | 40    | 2.06 | 1.80-2.35  | 3.08   | 2.58-3.68 | 0.10    | 1299     | 0.08 | 3287 |
| population=(*, 787),totalRooms=[2126, 3147)          | 38    | 5.10 | 3.79-6.85  | 2.05   | 1.71-2.47 | 0.08    | 1294     | 0.24 | 147  |
| housingMedianAge=[36, *),latitude=[33.93, 34.25)     | 38    | 1.99 | 1.70c-2.32 | 3.34   | 2.80-3.98 | 0.11    | 1378     | 0.09 | 1996 |
| longitude=[-118.49, -118.00),population=[1166, 1725) | 35    | 1.27 | 1.02-1.59  | 1.38   | 1.14-1.68 | 0.06    | 1289     | 0.06 | 1333 |
| latitude=[33.93, 34.25),population=[1166, 1725)      | 35    | 1.29 | 1.04-1.61  | 1.36   | 1.12-1.66 | 0.06    | 1275     | 0.06 | 1312 |
| housingMedianAge=[36, *),totalRooms=[3147, *)        | 32    | 4.44 | 3.62-5.44  | 2.77   | 2.32-3.32 | 0.10    | 1382     | 0.20 | 411  |
| population=[787, 1166),totalRooms=[3147, *)          | 30    | 5.52 | 4.01-7.60  | 1.73   | 1.44-2.09 | 0.07    | 1293     | 0.26 | 112  |

'Rule (LHS)' is the left-hand-side (condition) part of the rule, 'Score' is the Ciruvs connection score, 'RR' is the relative risk, 'RR CI' is the 95 % confidence interval of the RR, 'RR exp' and 'RR CI exp' is the expected RR and CI assuming multiplicative effects. 'Acc' is the rule accuracy, 'Supp' is the rule support. 'Acc exp' and 'Supp exp' is the expected accuracy and support assuming independent effects.
