# Supplementary material for: Ciruvis: a web-based tool for rule networks and interaction detection using rule-based classifiers
Source: PubMed Central journal article supplement (PMC4030460; doi:10.1186/1471-2105-15-139), 2014-05-12
Supplement: 1471-2105-15-139-S9.pdf [file 1471-2105-15-139-S9.pdf]

## Table S4

The 30 most significant features for the leukemia data (p-values calculated by MCFS). The original name refer to the internal name in the source data set. The gene name is given whenever it was available. The range for the discretized expression values are given as Low, Medium (if applicable) and High.

| Original name    | Gene     | Low       | Medium    | High      | p-value   |
|------------------|----------|-----------|-----------|-----------|-----------|
| X95735_at        | ZYX      | (*, 994)  |           | [994, *)  | <2.7E-297 |
| M27891_at        | CST3     | (*, 947)  |           | [947, *)  | <2.7E-297 |
| M77142_at        | TIA1     | (*, 81)   |           | [81, *)   | <2.7E-297 |
| U46499_at        | MGST3    | (*, 157)  |           | [157, *)  | <2.7E-297 |
| X70297_at        | CHRFAM7A | (*, 339)  |           | [339, *)  | <2.7E-297 |
| D88422_at        | CSTA     | (*, 235)  |           | [235, *)  | 2.7E-297  |
| M55150_at        | FAH      | (*, 1346) |           | [1346, *) | 8.3E-282  |
| U22376_cds2_s_at | MYB      | (*, 1423) |           | [1423, *) | 6.6E-265  |
| L09209_s_at      | APLP2    | (*, 993)  |           | [993, *)  | 6.1E-256  |
| D14874_at        | ADM      | (*, 185)  |           | [185, *)  | 4.8E-236  |
| M31523_at        | TCF3     | (*, 416)  |           | [416, *)  | 9.4E-219  |
| J05243_at        | SPTAN1   | (*, 136)  |           | [136, *)  | 1.3E-213  |
| M91432_at        | ACADM    | (*, 394)  |           | [394, *)  | 1.9E-206  |
| M31166_at        | PTX3     | (*, 84)   |           | [84, *)   | 1.2E-188  |
| M23197_at        | CD33     | (*, 313)  |           | [313, *)  | 4.5E-186  |
| U50136_rna1_at   | LTC4S    | (*, 1341) |           | [1341, *) | 2.1E-185  |
| M16038_at        | LYN      | (*, 652)  |           | [652, *)  | 6.6E-178  |
| M92287_at        | CCND3    | (*, 1870) |           | [1870, *) | 2.1E-176  |
| M12959_s_at      | TRA      | (*, 821)  |           | [821, *)  | 4.3E-173  |
| M81933_at        | CDC25A   | (*, 128)  |           | [128, *)  | 1.8E-164  |
| U73737_at        | MSH6     | (*, 93)   | [93, 165) | [165, *)  | 9.9E-159  |
| U09087_s_at      | TMPO     | (*, 78)   |           | [78, *)   | 6.2E-147  |
| X15949_at        | IRF2     | (*, 30)   | [30, 85)  | [85, *)   | 5.1E-145  |
| X74262_at        | RBBP4    | (*, 626)  |           | [626, *)  | 4.5E-136  |
| U02020_at        | NAMPT    | (*, 382)  |           | [382, *)  | 2.1E-134  |
| Y12670_at        | LEPR     | (*, 642)  |           | [642, *)  | 2.7E-123  |
| X17042_at        | SRGN     | (*, 5551) |           | [5551, *) | 6.9E-120  |
| M83652_s_at      | CFP      | (*, 542)  |           | [542, *)  | 4.1E-117  |
| X59417_at        | PSMA6    | (*, 1797) |           | [1797, *) | 1.3E-116  |
| Y00787_s_at      | IL8      | (*, 1687) |           | [1687, *) | 1.8E-116  |
